# Supplementary material
Source: publisher figshare collection journal article supplement (https://acs.figshare.com/ndownloader/files/18609026)
Supplement: Supplementary file 1 [file 18609026]

## **Supporting Information**

### **A colorimetric immunoassay based on coordination polymer composite for the detection of carcinoembryonic antigen**

Sixuan Wu, Hongliang Tan\*, Caihong Wang, Jinhong Wang, Shouri Sheng\*

Key laboratory of Chemical Biology of Jiangxi Province, College of Chemistry and Chemical Engineering, Jiangxi Normal University, Nanchang, 330022, China

\* E-mail: [hltan@jxnu.edu.cn](mailto:hltan@jxnu.edu.cn) (H. Tan)

[shengsr@jxnu.edu.cn](mailto:shengsr@jxnu.edu.cn) (S. Sheng)

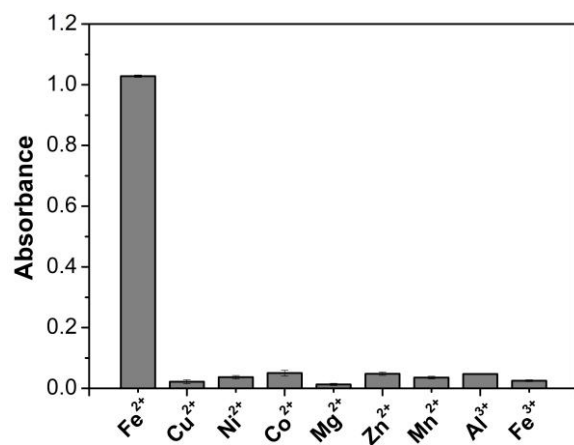

Figure S1. Absorbance responses of Phen solution to different metal ions (each 0.8 mM).

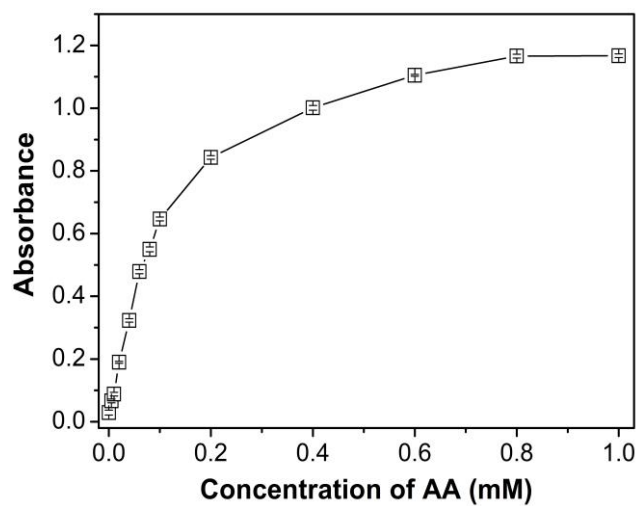

Figure S2. Absorbance of the Phen-Fe<sup>3+</sup> solution in the presence of AA with different concentrations.

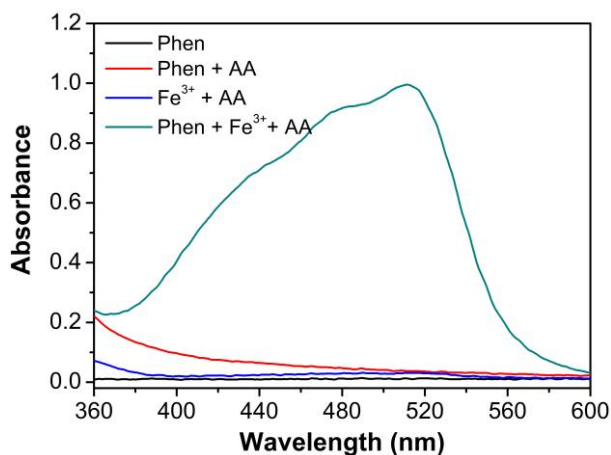

Figure S3. Absorption spectra of the solutions of Phen, Phen + AA,  $\text{Fe}^{3+}$  + AA, and Phen +  $\text{Fe}^{3+}$  + AA.

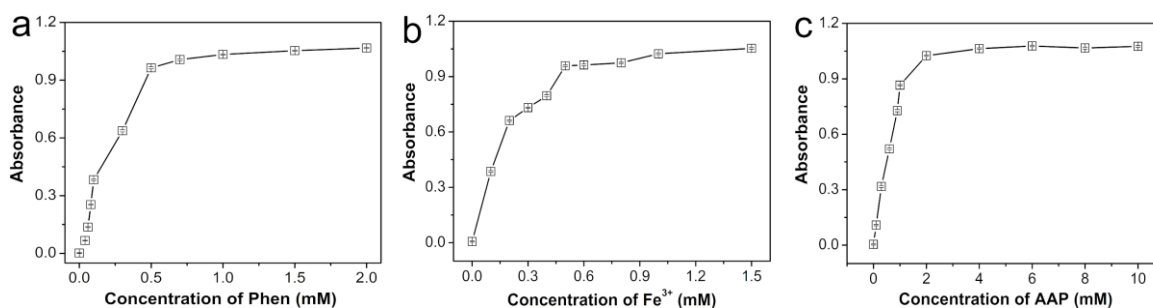

Figure S4. Absorbance intensity of  $[(\text{Phen})_3\text{Fe}]^{2+}$  complex at 510 nm under different conditions. (a) The concentration of  $\text{Fe}^{3+}$  and AAP are fixed at 0.5 and 2 mM, respectively, while Phen concentration is varied. (b) The concentration of Phen and AAP are fixed at 0.5 and 2 mM, respectively, while  $\text{Fe}^{3+}$  concentration is varied. (c) The concentration of  $\text{Fe}^{3+}$  and Phen are both at 0.5 mM, while AAP concentration is varied.

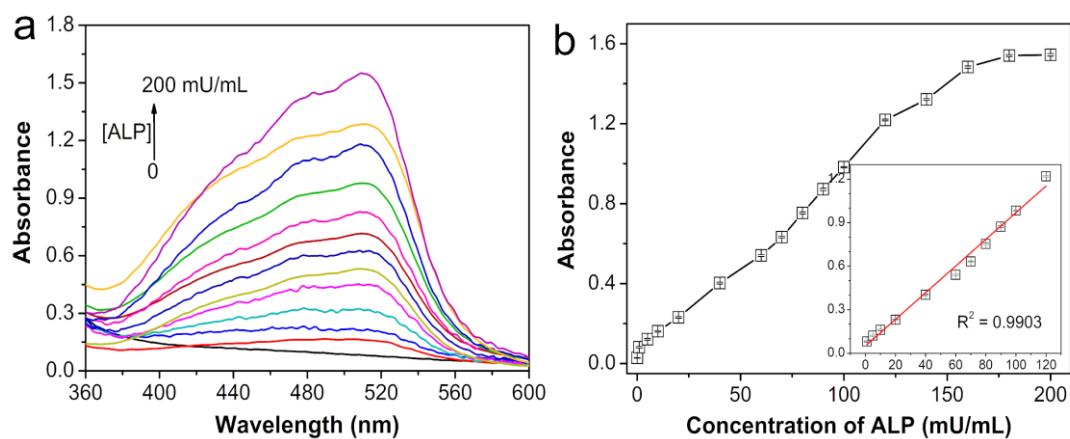

Figure S5. Absorption spectra (a) and intensity at 510 nm (b) of the Phen-Fe<sup>3+</sup> solution in the presence of 2 mM of AAP and ALP with different concentrations. Inset is the calibration curve of the absorbance of [(Phen)<sub>3</sub>Fe]<sup>2+</sup> complex at 510 nm versus ALP concentration.

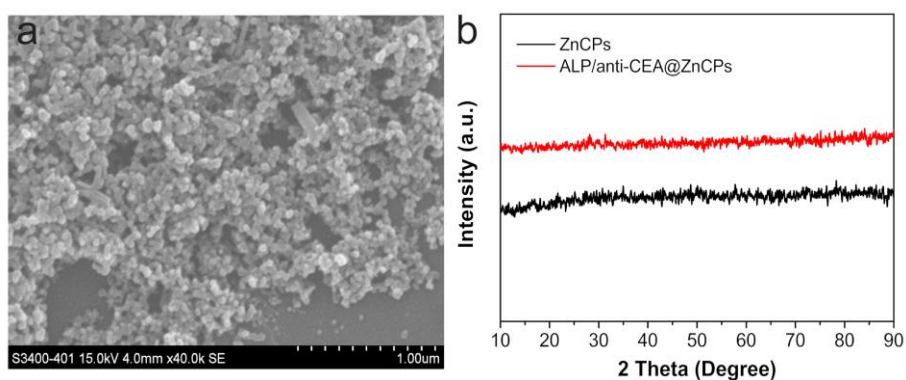

Figure S6. (a) SEM image of ZnCPs. (b) Powder XRD patterns of ZnCPs and ALP/anti-CEA@ZnCPs.

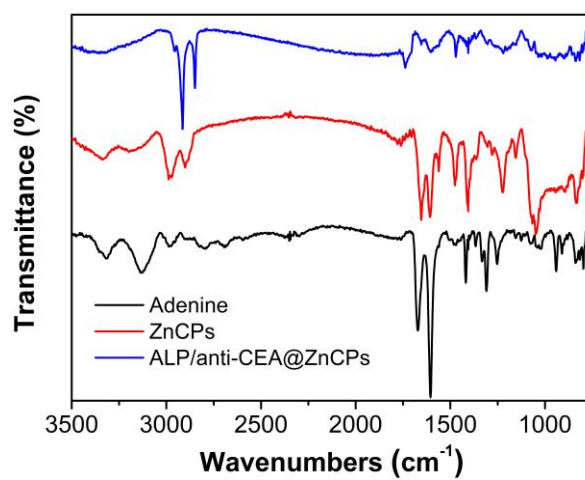

Figure S7. FTIR spectra of adenine, ZnCPs and ALP/anti-CEA@ZnCPs.

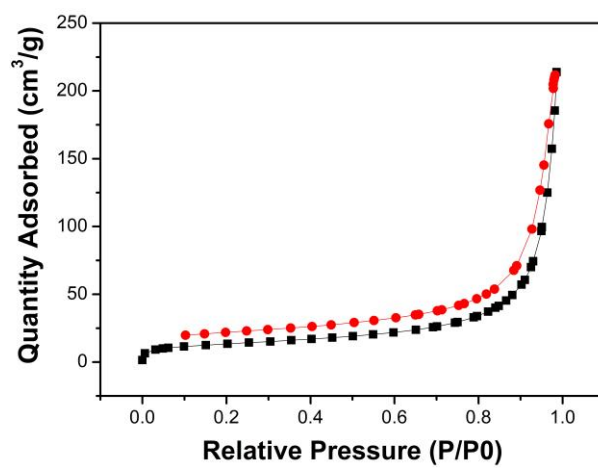

Figure S8.  $\text{N}_2$  adsorption-desorption isotherms of ZnCPs.

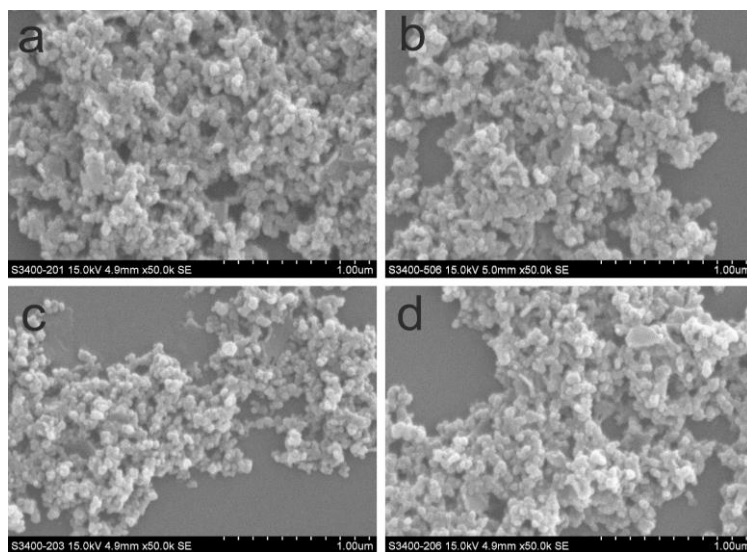

Figure S9. SEM images of ZnCPs after keeping in aqueous solution for different times (from a to d: 0, 1, 3, 7 days).

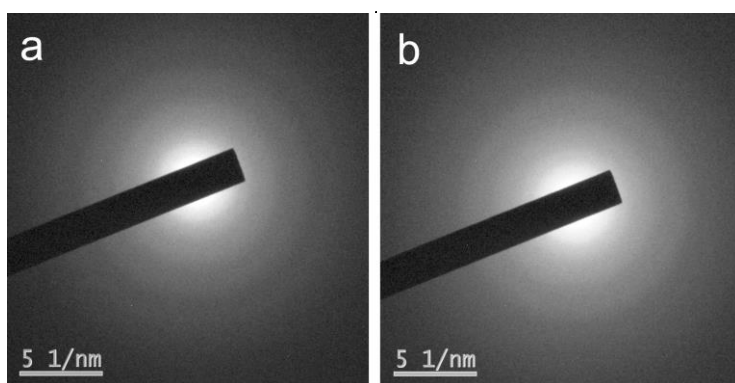

Figure S10. Selected area electron diffraction images of ZnCPs (a) and ALP/anti-CEA@ZnCPs (b).

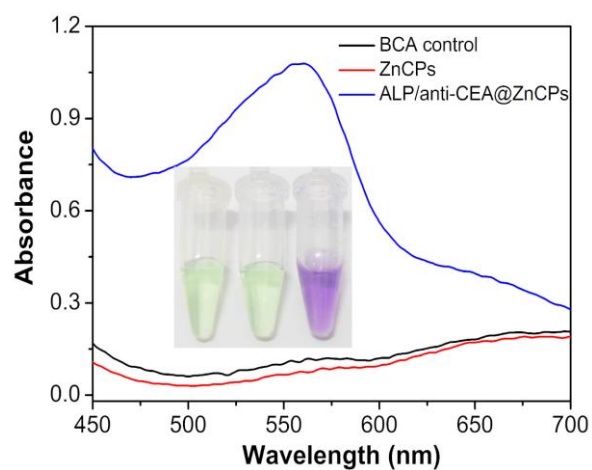

Figure S11. BCA assay of ZnCPs and ALP/anti-CEA@ZnCPs.

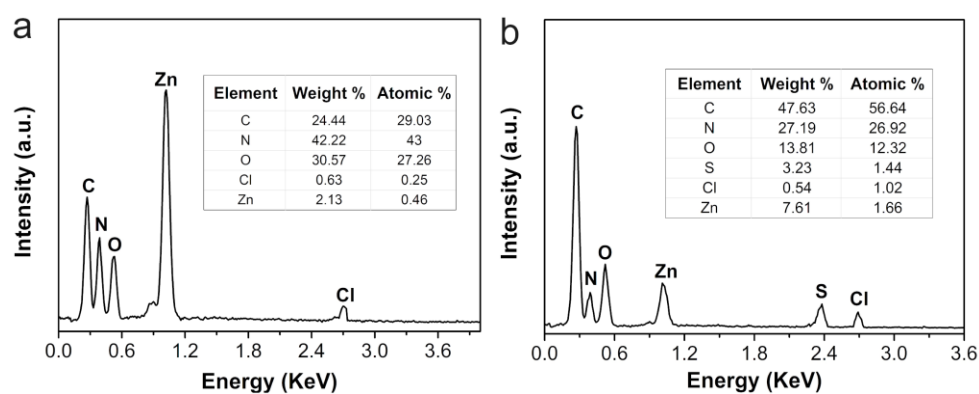

Figure S12. EDS spectra of ZnCPs (a) and ALP/anti-CEA@ZnCPs (b).

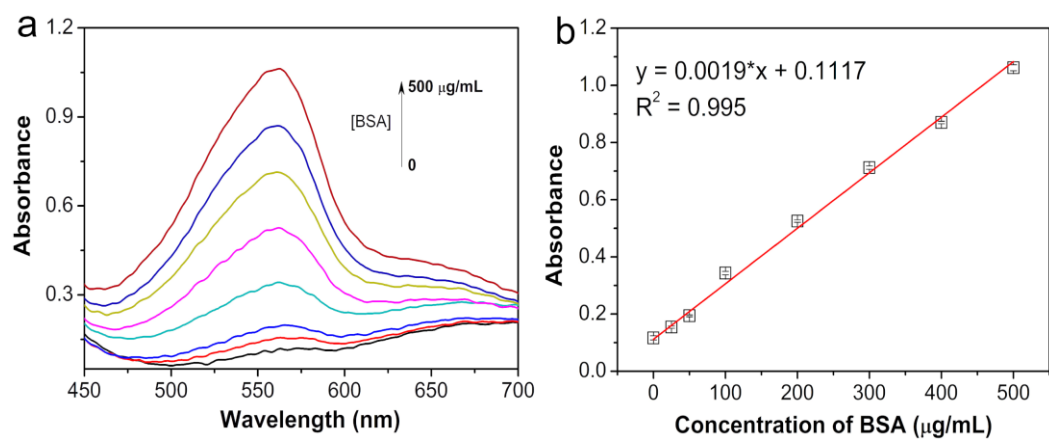

Figure S13. (a) Absorbance spectra of BCA reagent in the presence of bovine serum albumin (BSA) with concentration from 0 to 500  $\mu\text{g/mL}$ . (b) The calibration curve of the absorbance of BCA reagent at 650 nm as a function of BSA concentrations.

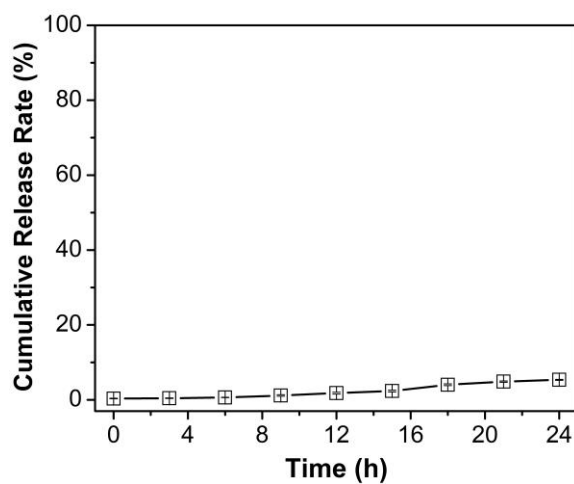

Figure S14. Proteins release profile from ALP/anti-CEA@ZnCPs in ultrapure water.



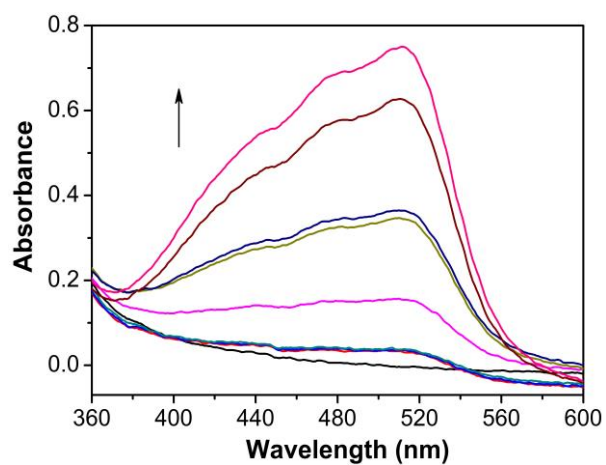

Figure S15. Absorption spectra of Phen-Fe<sup>3+</sup> solution in the presence of AAP (2 mM) and ALP/anti-CEA@ZnCPs with different amounts (from 0 to 100 µg).

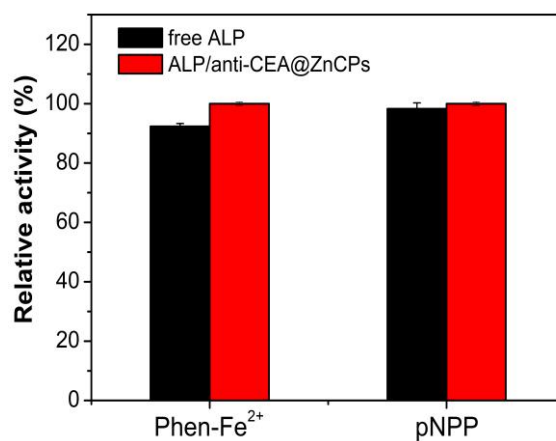

Figure S16. Relative activities of free ALP and ALP/anti-CEA@ZnCPs obtained from substrate systems of pNPP and the mixture of Phen and Fe<sup>2+</sup> (Phen-Fe<sup>2+</sup>).

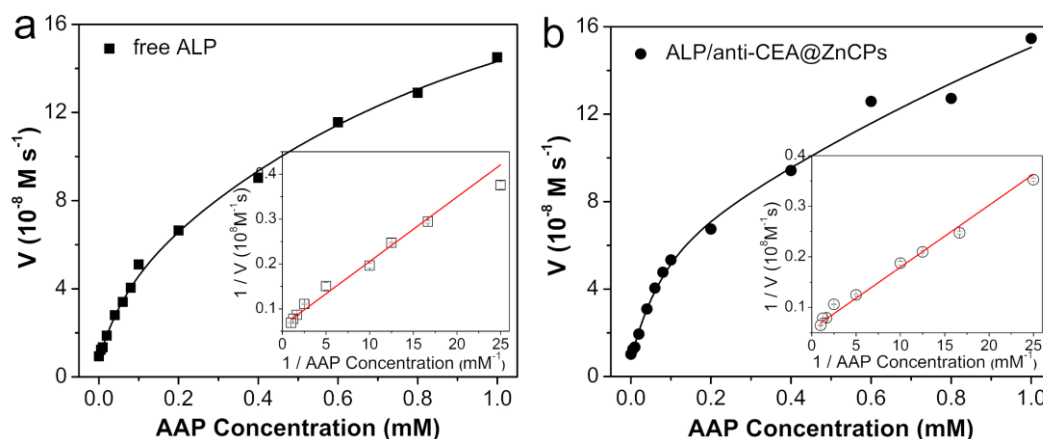

Figure S17. (a) Steady-state kinetic assays of free ALP (a) and ALP/anti-CEA@ZnCPs (b) in the presence of AAP with different concentrations. The insets are their corresponding double-reciprocal plots.

The kinetic behaviors of free ALP and ALP/anti-CEA@ZnCPs were studied by monitoring the absorbance of  $[(\text{Phen})_3\text{Fe}]^{2+}$  complex in 3-min intervals while varying the AAP concentration. The Michaelis-Menten constant was calculated by using Lineweaver-Burk plots of the double reciprocal of the Michaelis-Menten equation,  $1/v = K_m/V_m (1/[S] + 1/K_m)$ , where  $v$  is the initial velocity,  $V_m$  represents the maximal reaction velocity,  $[S]$  corresponds to the substrate concentration, and  $K_m$  is the Michaelis constant.

Table S1. Kinetic data for free ALP and ALP/anti-CEA@ZnCPs

| Catalyst           | $K_m$ (mM) | $V_{\max}$ ( $10^{-8} \text{ M s}^{-1}$ ) | $K_{\text{cat}}$ ( $\text{s}^{-1}$ ) |
|--------------------|------------|-------------------------------------------|--------------------------------------|
| free ALP           | 0.15       | 7.53                                      | 68.45                                |
| ALP/anti-CEA@ZnCPs | 0.12       | 8.05                                      | 73.18                                |

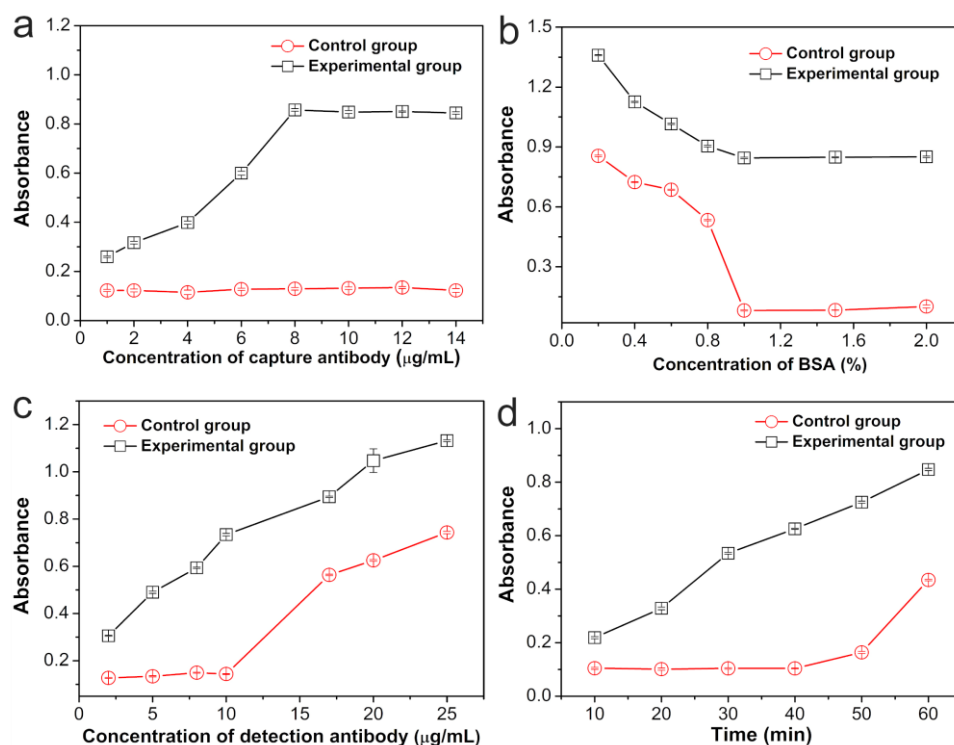

Figure S18. Effects of the concentration of capture antibody (a), blocking agent (b), ALP/anti-CEA@ZnCPs (c), and reaction time (d) on ALP/anti-CEA@ZnCPs-based immunoassays with (red, as experimental group) and without (black, as control group) antigens.

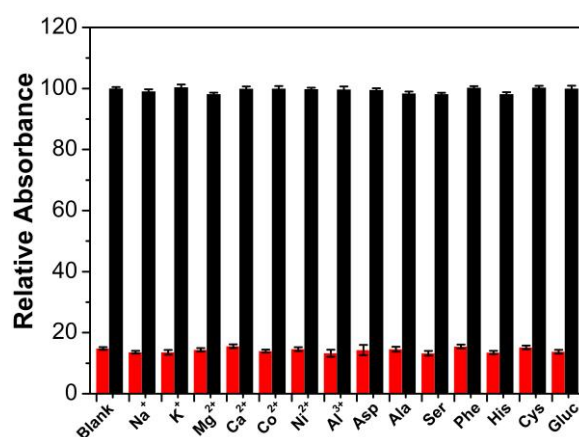

Figure S19. Effects of metal ions and biological species on the colorimetric immunoassay based on ALP/anti-CEA@ZnCPs as a detection antibody. Black bars represent the addition of single interfering material (100  $\mu\text{M}$ ). Red bars represent the addition of the mixture of CEA (100 ng/mL) and interfering materials (100  $\mu\text{M}$ ).

Table S2. Comparison of various immunoassays for CEA detection.

| <b>Antibody labels</b> | <b>Readout signal</b>    | <b>Linear range<br/>(ng/mL)</b> | <b>LOD<br/>(pg/mL)</b> | <b>Ref.</b> |
|------------------------|--------------------------|---------------------------------|------------------------|-------------|
| Gold nanoparticle      | Colorimetric             | 0.05 - 50                       | 48                     | 1           |
| Nanogold/graphene      | Electrochemical          | 0.05 - 350                      | 10                     | 2           |
| HRP                    | Electrochemical          | 0.5 - 167                       | 100                    | 3           |
| AuNP                   | Chemiluminescence        | 5 - 20                          | 100                    | 4           |
| Eu <sup>3+</sup>       | Fluorescence             | 1 - 1000                        | 500                    | 5           |
| ZnO/GOx-graphene       | Electrochemiluminescence | 0.01 - 80                       | 3.3                    | 6           |
| Ag@Au nanoparticle     | Dynamic light scattering | 0.06 - 50                       | 35.6                   | 7           |
| ALP/anti-CEA@ZnCPs     | Colorimetric             | 0.05 - 100                      | 21.1                   | This work   |

Table S3. Determination of CEA in human sample

| <b>Added<br/>(ng/mL)</b> | <b>Detected<br/>(ng/mL)</b> | <b>Recovery (%)</b> | <b>RSD (n =3, %)</b> | <b>Kit assay<br/>(ng/mL)</b> |
|--------------------------|-----------------------------|---------------------|----------------------|------------------------------|
| 20                       | 19.98                       | 99.9                | 1.24                 | 20.01                        |
| 40                       | 40.27                       | 100.67              | 0.32                 | 40.13                        |
| 60                       | 61.66                       | 102.76              | 0.56                 | 59.87                        |
| 80                       | 76.33                       | 95.41               | 0.37                 | 79.73                        |

### Calculation of detection limit

The detection limit was calculated according to previous reports.<sup>8-9</sup> The absorbance signals of the blank sample (without target CEA) were executed with three repeated experiments, which exhibits an average absorbance signal ( $I_{blank}$ ) of 1.00 and a standard deviation (SD) of 0.5269. With a signal-to-noise ratio of 3, the minimum detectable signal (A) could be calculated as  $A = I_{blank} + 3SD = 2.5809$ . The value of 2.5809 was then inserted into the linear equation ( $y = 0.1451x + 2.5778$ ). On this basis, the LOD was finally calculated to be 21.1pg/mL.

### References

1. Liu, M.; Jia, C.; Jin, Q.; Lou, X.; Yao, S.; Xiang, J.; Zhao, J., Novel Colorimetric Enzyme Immunoassay for the Detection of Carcinoembryonic Antigen. *Talanta* **2010**, *81*, 1625-1629.
2. Zhong, Z.; Wu, W.; Wang, D.; Wang, D.; Shan, J.; Qing, Y.; Zhang, Z., Nanogold-Enwrapped Graphene Nanocomposites as Trace Labels for Sensitivity Enhancement of Electrochemical Immunosensors in Clinical Immunoassays: Carcinoembryonic Antigen as a Model. *Biosens. Bioelectron.* **2010**, *25*, 2379-2383.
3. Dai, Z.; Yan, F.; Yu, H.; Hu, X.; Ju, H., Novel Amperometric Immunosensor for Rapid Separation-Free Immunoassay of Carcinoembryonic Antigen. *J. Immunol. Methods* **2004**, *287*, 13-20.
4. Yang, X.; Guo, Y.; Wang, A., Luminol/Antibody Labeled Gold Nanoparticles for Chemiluminescence Immunoassay of Carcinoembryonic Antigen. *Anal. Chim. Acta* **2010**, *666*, 91-96.
5. Hou, J.-Y.; Liu, T.-C.; Lin, G.-F.; Li, Z.-X.; Zou, L.-P.; Li, M.; Wu, Y.-S., Development of an Immunomagnetic Bead-Based Time-Resolved Fluorescence Immunoassay for Rapid Determination of Levels of Carcinoembryonic Antigen in Human Serum. *Anal. Chim. Acta* **2012**, *734*, 93-98.
6. Cheng, Y.; Yuan, R.; Chai, Y.; Niu, H.; Cao, Y.; Liu, H.; Bai, L.; Yuan, Y., Highly Sensitive Luminol Electrochemiluminescence Immunosensor Based On ZnO Nanoparticles and Glucose Oxidase Decorated Graphene for Cancer Biomarker Detection. *Anal. Chim. Acta* **2012**, *745*, 137-142.
7. Miao, X.; Zou, S.; Zhang, H.; Ling, L., Highly Sensitive Carcinoembryonic Antigen Detection Using Ag@Au Core-Shell Nanoparticles and Dynamic Light Scattering. *Sens. Actuators B-Chem.* **2014**, *191*, 396-400.
8. Long, G. L.; Winefordner, J. D., Limit of Detection. A Closer Look at the IUPAC Definition. *Anal. Chem.* **1983**, *55*, 712A-724A.
9. Chen, A.; Ma, S.; Zhuo, Y.; Chai, Y.; Yuan, R., In Situ Electrochemical Generation of Electrochemiluminescent Silver Nanoclusters on Target-Cycling Synchronized Rolling Circle Amplification Platform for MicroRNA Detection. *Anal. Chem.* **2016**, *88*, 3203-3210.
